# Supplementary material for: Developmental roadmap for antimicrobial susceptibility testing systems
Source: PubMed Central journal article supplement (PMC7138758; doi:10.1038/s41579-018-0098-9), 2018-10-17
Supplement: 41579_2018_98_MOESM1_ESM.pdf [file 41579_2018_98_MOESM1_ESM.pdf]

# Developmental roadmap for antimicrobial susceptibility testing systems

---

*Alex van Belkum, Till T. Bachmann, Gerd Lüdke, Jan Gorm Lisby, Gunnar Kahlmeter, Allan Mohess, Karsten Becker, John P. Hays, Neil Woodford, Konstantinos Mitsakakis, Jacob Moran-Gilad, Jordi Vila, Harald Peter, John H. Rex and Wm. Michael Dunne Jr, the JPIAMR AMR-RDT Working Group on Antimicrobial Resistance and Rapid Diagnostic Testing*

<https://doi.org/10.1038/s41579-018-0098-9>

## Supplementary information S1

This is an initiative of the Transnational Working Group Rapid Diagnostics funded by the [Joint Programming Initiative on Antimicrobial Resistance](#)

### The JPIAMR Working Group on AMR-RDT:

|                                   |                                            |    |
|-----------------------------------|--------------------------------------------|----|
| Till T. Bachmann<br>(coordinator) | University of Edinburgh                    | UK |
| Alex van Belkum                   | BioMérieux                                 | FR |
| Alasdair MacGowan                 | North Bristol NHS Trust                    | UK |
| Aman Russom                       | KTH Royal Institute of Technology          | SE |
| Andrew Shepherd                   | Omega Diagnostics                          | UK |
| Ann Van den Bruel                 | NIHR Diagnostic Evidence Cooperative       | UK |
| Annika Eriksson                   | HemoCue AB                                 | SE |
| Barbara Fallowfield               | British In Vitro Diagnostics Association   | UK |
| Cassandra Kelly-Cirino            | Foundation for Innovative New Diagnostics  | CH |
| Carla Deakin                      | NICE                                       | UK |
| Eiichi Tamiya                     | Osaka University                           | JP |
| Francis Moussy                    | World Health Organization, <i>Observer</i> | CH |
| Franck Molina                     | European Diagnostics Cluster Alliance      | FR |
| Frank Apostel                     | R-Biopharm                                 | DE |
| Frank Bier                        | Fraunhofer IZI-BB                          | DE |
| Gerd Luedke                       | Curetis GmbH                               | DE |
| Guido Werner                      | Robert Koch Institute                      | DE |
| Gunnar S. Simonsen                | University of Tromsø                       | NO |
| Gyorgy Abel                       | Lahey Hospital, Harvard University         | US |
| Herman Goossens                   | Antwerp University                         | BE |
| Jacob Moran-Gilad                 | Ben-Gurion University & Ministry of Health | IL |
| James Fraser                      | Chipcare                                   | CA |
| Jean François de Lavison          | Ahimsa Fund                                | FR |
| John Hays                         | Erasmus University Medical Center          | NL |
| John Rex                          | F2G, Ltd.                                  | US |
| Jordi Vila                        | Institute of Global Health Barcelona       | ES |
| Karsten Becker                    | University Hospital Münster, DGHM          | DE |
| Kate Templeton                    | NHS Lothian                                | UK |
| Kirsten Miller-Duys               | Hyrax Biosciences                          | SA |
| Konstantinos Mitsakakis           | Hahn-Schickard                             | DE |
| Manica Balasegeram                | GARDP/DNDI                                 | CH |
| Mark Woolhouse                    | University of Edinburgh                    | UK |
| Neil Butler                       | Spectromics                                | UK |
| Neil Woodford                     | Public Health England                      | UK |

|                          |                                                       |           |
|--------------------------|-------------------------------------------------------|-----------|
| Paul Savelkoul           | Maastricht University                                 | NL        |
| Petra Gastmeier          | Charite Berlin, Infect Control 2020                   | DE        |
| Philippe Lagace-Wiens    | University of Manitoba (left)                         | CA        |
| Ramanan Laxminarayan     | Center for Disease Dynamics, Economics & Policy       | US/<br>IN |
| Rosanna Peeling          | London School of Hygiene & Tropical Med.              | UK        |
| Saturnino Luz            | Usher Institute                                       | UK        |
| Sören Schubert           | Max von Pettenkofer Institute Munich                  | DE        |
| Stephan Harbarth         | University of Geneva                                  | CH        |
| Sue Hill                 | NHS England                                           | UK        |
| Tracy Merlin             | University of Adelaide                                | AU        |
| Taslimarif Saiyed        | Centre for Cellular and Molecular Platforms           | IN        |
| Thomas Wichelhaus        | University Frankfurt; Paul Ehrlich Society            | DE        |
| Tjeerd van Staa          | Farr Institute Health Informatics Research            | UK        |
| Valentina Di Gregori     | San Pier Damiano Hospital Faenza (ex Univ of Bologna) | IT        |
| Wouter van der Wijngaart | KTH Royal Institute of Technology                     | SE        |
| Wilfried von Eiff        | HHL Leipzig                                           | DE        |
